# Supplementary material for: Identifying high-efficiency oxygen evolution electrocatalysts from Co–Ni–Cu based selenides through combinatorial electrodeposition
Source: Royal Society of Chemistry journal article supplement (doi:10.1039/c9ta00863b), 2019-01-01
Supplement: c9ta00863b1.pdf [file c9ta00863b1.pdf]

# Identifying High-efficiency Oxygen Evolution Electrocatalysts from Co-Ni-Cu Based Selenides through Combinatorial Electrodeposition

*Xi Cao<sup>a</sup>, Emily Johnson<sup>b</sup> and Manashi Nath<sup>\*a</sup>*

<sup>a</sup>Department of Chemistry, Missouri University of Science & Technology, Rolla, Missouri 65409, United States.

<sup>b</sup>Department of Chemical and Biochemical Engineering, Missouri University of Science & Technology, Rolla, Missouri 65409, United States.

\*Email: [nathm@mst.edu](mailto:nathm@mst.edu)

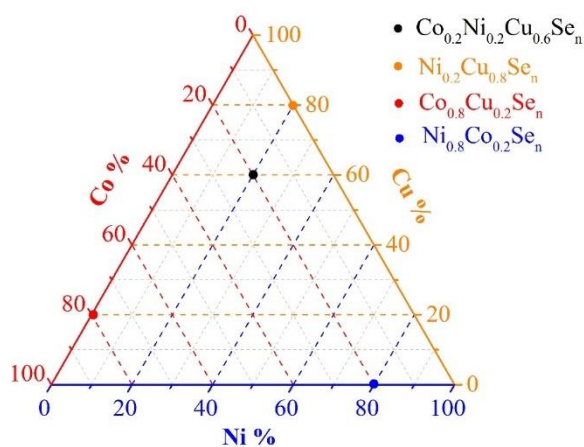

**Figure S1.** Trigonal phase diagram for exploring compositions of the mixed-metal (Co, Ni, Cu) selenide films examined in this work. Crossing vertices represent compositions of the precursor electrolyte with respect to the relative ratio of the corresponding metals. Color spots indicate typical examples.

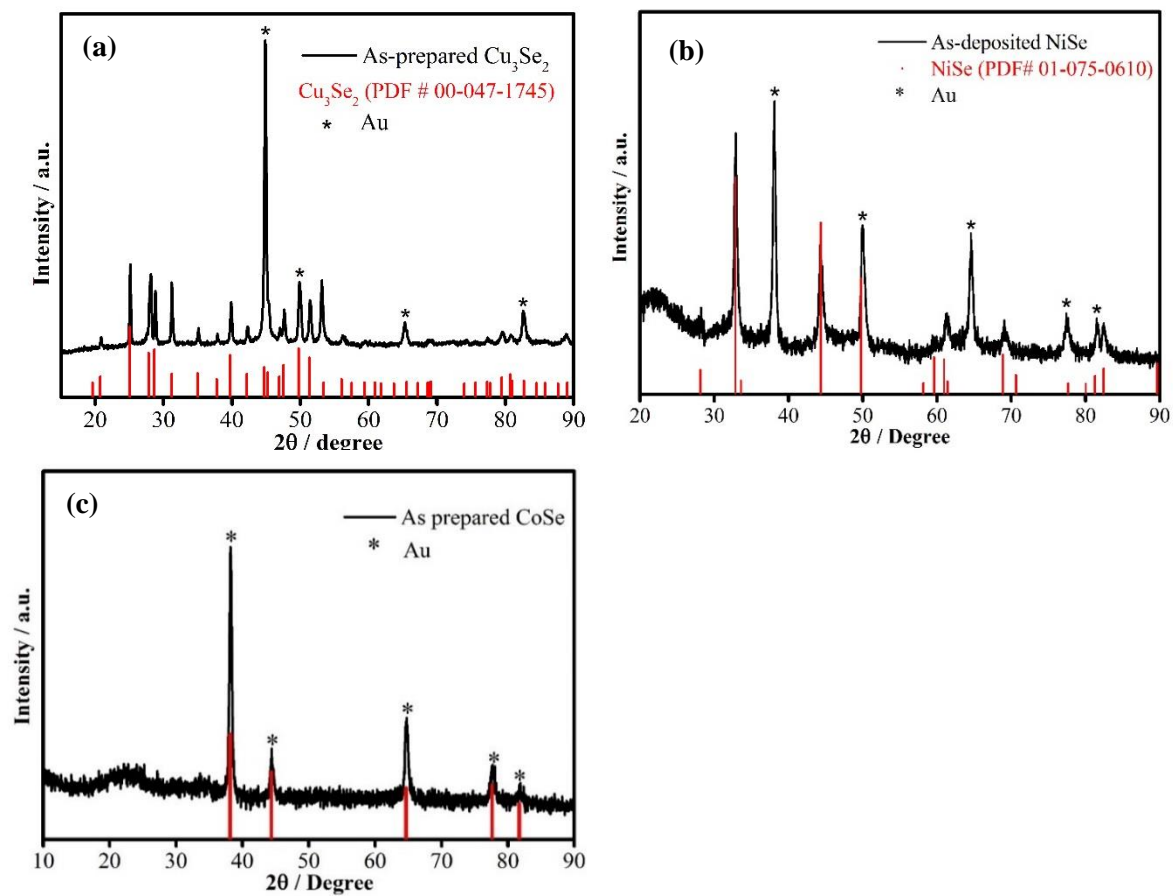

Figure S2. XRD pattern of  $\text{Cu}_3\text{Se}_2$  (a), NiSe (b) and CoSe (c).

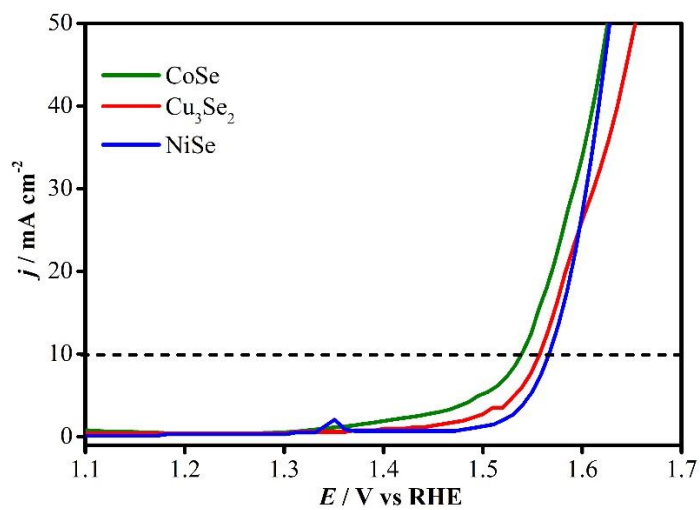

Figure S3. Polarization curves of three binary selenides.

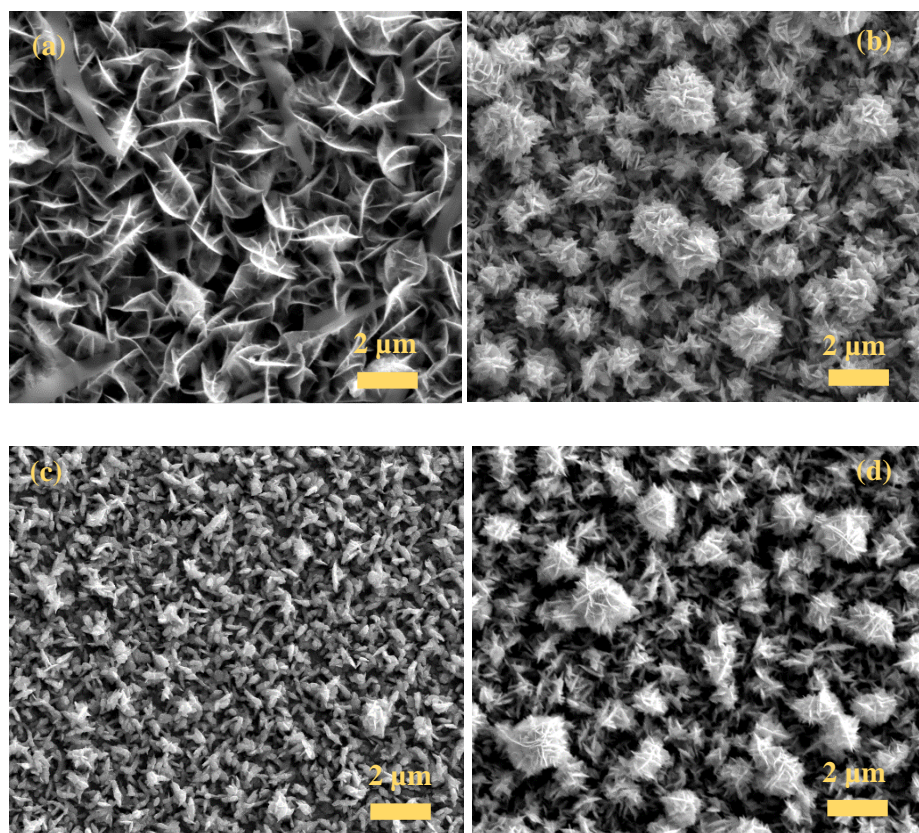

**Figure S4.** SEM images of selected best performing quaternary  $(\text{Co}_{0.08}\text{Ni}_{0.28}\text{Cu}_{0.63})_3\text{Se}_2$  (a),  $(\text{Co}_{0.31}\text{Ni}_{0.23}\text{Cu}_{0.46})_3\text{Se}_2$  (b),  $(\text{Co}_{0.15}\text{Ni}_{0.26}\text{Cu}_{0.59})_3\text{Se}_2$  (c) and  $(\text{Co}_{0.21}\text{Ni}_{0.25}\text{Cu}_{0.54})_3\text{Se}_2$  (d).

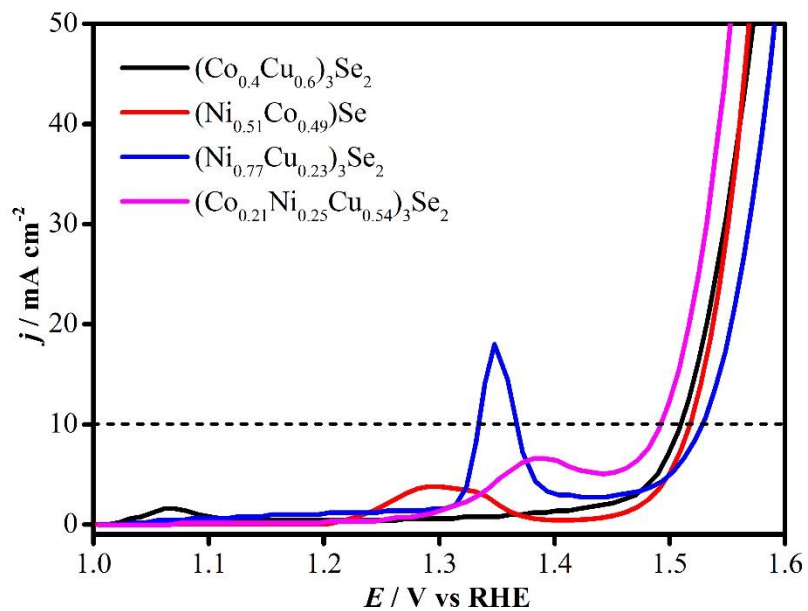

**Figure S5.** Polarization curves of best quaternary and best ternary selenides.

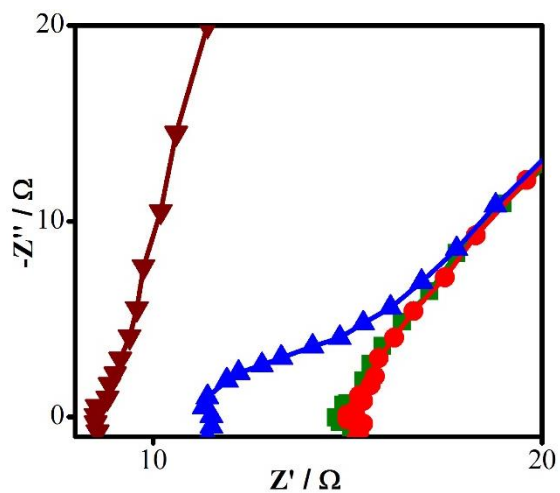

**Figure S6.** Zoomed-in Nyquist Plots of  $(\text{Co}_{0.21}\text{Cu}_{0.25}\text{Ni}_{0.54})_3\text{Se}_2$  (green), CoSe (red), NiSe (wine) and  $\text{Cu}_3\text{Se}_2$  (blue).

**Table S1.** The EDS atomic ratio of ternaries with respect to their precursor's ratio at applied potential of -0.7 V or -1.0 V vs Ag/AgCl.

| $E_{\text{applied}} / \text{V vs Ag/AgCl}$ | Precursor Molar Ratio (mM) |    |    |    | Averaged atomic % (EDS) |      |      |      |
|--------------------------------------------|----------------------------|----|----|----|-------------------------|------|------|------|
|                                            | Ni                         | Cu | Co | Se | Ni                      | Cu   | Co   | Se   |
| - 0.7 V                                    | 2                          | 8  | -  | 10 | 0                       | 57.2 | -    | 42.8 |
|                                            | 4                          | 6  | -  | 10 | 0                       | 52.5 | -    | 47.5 |
|                                            | 6                          | 4  | -  | 10 | 0.2                     | 43.4 | -    | 56.4 |
|                                            | 8                          | 2  | -  | 10 | 0.3                     | 30.4 | -    | 69.3 |
|                                            | -                          | 8  | 2  | 10 | -                       | 55.7 | 0    | 44.3 |
|                                            | -                          | 6  | 4  | 10 | -                       | 49.2 | 1.8  | 48.9 |
|                                            | -                          | 4  | 6  | 10 | -                       | 42.2 | 2.2  | 55.1 |
|                                            | -                          | 2  | 8  | 10 | -                       | 33.2 | 2.6  | 64.2 |
|                                            | - 1.0 V                    | 6  | 4  | -  | 10                      | 28.6 | 37.1 | -    |
| -                                          |                            | 4  | 6  | 10 | -                       | 32   | 35   | 33   |
| 6                                          |                            | -  | 4  | 10 | 29.8                    | -    | 32.8 | 37.4 |

**Table S2.** Summary of Elemental Analysis of Metal Selenide Films Determined by EDS and Corresponding Kinetic Parameters Extracted from Polarization Curves.

| Precursor Molar Ratio (mM) |    |    |    | Averaged atomic % (EDS) |      |      |      | Onset $\eta$ (V) | $\eta$ 10mA $\text{cm}^{-2}$ (V) | Tafel Slope |
|----------------------------|----|----|----|-------------------------|------|------|------|------------------|----------------------------------|-------------|
| Ni                         | Cu | Co | Se | Ni                      | Cu   | Co   | Se   |                  |                                  |             |
| 10                         | 0  | 0  | 10 | 50.5                    | 0.0  | 0.0  | 49.5 | 0.300            | 0.335                            | 66.2        |
| 0                          | 10 | 0  | 10 | 0.0                     | 63.8 | 0.0  | 36.2 | 0.282            | 0.326                            | 82.9        |
| 0                          | 0  | 10 | 10 | 0.0                     | 0.0  | 47.0 | 53.0 | 0.262            | 0.308                            | 177.4       |
| 1                          | 9  | 0  | 10 | 3.6                     | 56.1 | 0.0  | 40.3 | 0.332            | 0.373                            | 85.5        |
| 2                          | 8  | 0  | 10 | 7.4                     | 53.2 | 0.0  | 39.4 | 0.326            | 0.356                            | 115.6       |
| 3                          | 7  | 0  | 10 | 14.4                    | 49.1 | 0.0  | 36.4 | 0.304            | 0.337                            | 96.4        |
| 4                          | 6  | 0  | 10 | 18.2                    | 46.8 | 0.0  | 35.0 | 0.315            | 0.363                            | 111.2       |
| 5                          | 5  | 0  | 10 | 23.7                    | 43.2 | 0.0  | 33.0 | 0.278            | 0.311                            | 98.0        |
| 6                          | 4  | 0  | 10 | 28.5                    | 33.4 | 0.0  | 38.1 | 0.322            | 0.359                            | 141.7       |

|   |   |   |    |      |      |      |      |       |       |       |
|---|---|---|----|------|------|------|------|-------|-------|-------|
| 7 | 3 | 0 | 10 | 32.7 | 30.8 | 0.0  | 36.5 | 0.275 | 0.306 | 89.4  |
| 8 | 2 | 0 | 10 | 35.4 | 15.1 | 0.0  | 49.5 | 0.326 | 0.369 | 67.1  |
| 9 | 1 | 0 | 10 | 47.6 | 14.1 | 0.0  | 38.3 | 0.268 | 0.299 | 90.4  |
| 0 | 9 | 1 | 10 | 0.0  | 57.6 | 2.6  | 39.8 | 0.297 | 0.323 | 88.4  |
| 0 | 8 | 2 | 10 | 0.0  | 48.9 | 10.1 | 41.0 | 0.260 | 0.284 | 77.0  |
| 0 | 7 | 3 | 10 | 0.0  | 50.0 | 15.6 | 34.4 | 0.268 | 0.290 | 60.2  |
| 0 | 6 | 4 | 10 | 0.0  | 45.2 | 18.3 | 36.5 | 0.279 | 0.302 | 91.2  |
| 0 | 5 | 5 | 10 | 0.0  | 38.3 | 24.9 | 36.8 | 0.257 | 0.278 | 72.5  |
| 0 | 4 | 6 | 10 | 0.0  | 31.2 | 27.7 | 41.1 | 0.277 | 0.299 | 68.7  |
| 0 | 3 | 7 | 10 | 0.0  | 31.0 | 31.6 | 37.3 | 0.275 | 0.299 | 78.2  |
| 0 | 2 | 8 | 10 | 0.0  | 16.2 | 44.6 | 39.2 | 0.291 | 0.315 | 66.6  |
| 0 | 1 | 9 | 10 | 0.0  | 9.6  | 44.7 | 45.7 | 0.291 | 0.312 | 87.0  |
| 1 | 0 | 9 | 10 | 6.2  | 0.0  | 49.2 | 44.7 | 0.262 | 0.292 | 71.5  |
| 2 | 0 | 8 | 10 | 9.8  | 0.0  | 41.1 | 49.1 | 0.269 | 0.298 | 58.1  |
| 3 | 0 | 7 | 10 | 16.3 | 0.0  | 34.6 | 49.2 | 0.278 | 0.306 | 74.3  |
| 4 | 0 | 6 | 10 | 22.3 | 0.0  | 31.2 | 46.5 | 0.298 | 0.325 | 72.9  |
| 5 | 0 | 5 | 10 | 26.9 | 0.0  | 25.7 | 47.3 | 0.259 | 0.289 | 60.7  |
| 6 | 0 | 4 | 10 | 28.4 | 0.0  | 17.4 | 54.2 | 0.294 | 0.318 | 60.3  |
| 7 | 0 | 3 | 10 | 38.1 | 0.0  | 15.2 | 46.7 | 0.291 | 0.315 | 60.4  |
| 8 | 0 | 2 | 10 | 47.1 | 0.0  | 15.8 | 37.1 | 0.311 | 0.339 | 59.9  |
| 9 | 0 | 1 | 10 | 53.2 | 0.0  | 6.2  | 40.6 | 0.320 | 0.346 | 51.2  |
| 1 | 1 | 8 | 10 | 5.7  | 11.5 | 36.9 | 45.8 | 0.270 | 0.299 | 59.8  |
| 1 | 2 | 7 | 10 | 5.9  | 15.5 | 35.4 | 43.2 | 0.280 | 0.310 | 63.4  |
| 1 | 3 | 6 | 10 | 6.1  | 19.6 | 33.8 | 40.5 | 0.260 | 0.289 | 58.3  |
| 1 | 4 | 5 | 10 | 4.5  | 36.9 | 22.9 | 35.7 | 0.257 | 0.284 | 67.5  |
| 1 | 5 | 4 | 10 | 4.9  | 38.6 | 19.7 | 36.8 | 0.254 | 0.282 | 57.0  |
| 1 | 6 | 3 | 10 | 5.5  | 44.4 | 10.7 | 39.4 | 0.266 | 0.298 | 56.3  |
| 1 | 7 | 2 | 10 | 3.0  | 53.5 | 4.4  | 39.2 | 0.259 | 0.287 | 65.5  |
| 1 | 8 | 1 | 10 | 3.0  | 56.7 | 2.8  | 37.6 | 0.261 | 0.296 | 102.9 |
| 2 | 1 | 7 | 10 | 11.5 | 11.1 | 34.9 | 42.5 | 0.291 | 0.327 | 74.1  |
| 2 | 2 | 6 | 10 | 11.8 | 19.8 | 32.2 | 36.2 | 0.274 | 0.311 | 60.0  |
| 2 | 3 | 5 | 10 | 9.7  | 29.0 | 24.0 | 37.3 | 0.272 | 0.304 | 61.3  |
| 2 | 4 | 4 | 10 | 9.7  | 28.8 | 20.2 | 41.3 | 0.251 | 0.283 | 69.6  |
| 2 | 5 | 3 | 10 | 11.1 | 40.1 | 15.3 | 33.5 | 0.256 | 0.288 | 83.6  |
| 2 | 6 | 2 | 10 | 9.9  | 45.4 | 9.8  | 35.0 | 0.251 | 0.283 | 71.3  |
| 2 | 7 | 1 | 10 | 9.5  | 52.2 | 3.9  | 34.4 | 0.256 | 0.288 | 67.6  |
| 3 | 1 | 6 | 10 | 15.9 | 12.8 | 28.3 | 43.1 | 0.272 | 0.313 | 67.2  |

|   |   |   |    |      |      |      |      |       |       |       |
|---|---|---|----|------|------|------|------|-------|-------|-------|
| 3 | 2 | 5 | 10 | 15.4 | 21.3 | 19.4 | 43.9 | 0.261 | 0.293 | 57.9  |
| 3 | 3 | 4 | 10 | 14.4 | 28.9 | 19.2 | 37.5 | 0.248 | 0.280 | 78.9  |
| 3 | 4 | 3 | 10 | 16.0 | 33.9 | 13.1 | 37.0 | 0.241 | 0.272 | 53.3  |
| 3 | 5 | 2 | 10 | 14.9 | 43.8 | 8.9  | 32.4 | 0.264 | 0.298 | 56.2  |
| 3 | 6 | 1 | 10 | 16.9 | 40.1 | 6.3  | 36.7 | 0.264 | 0.298 | 74.2  |
| 4 | 1 | 5 | 10 | 22.2 | 14.4 | 22.2 | 41.2 | 0.256 | 0.287 | 55.3  |
| 4 | 2 | 4 | 10 | 20.4 | 17.4 | 19.5 | 42.8 | 0.280 | 0.308 | 51.9  |
| 4 | 3 | 3 | 10 | 17.6 | 32.0 | 13.3 | 37.1 | 0.263 | 0.293 | 53.6  |
| 4 | 4 | 2 | 10 | 17.1 | 38.5 | 10.1 | 34.3 | 0.246 | 0.278 | 93.9  |
| 4 | 5 | 1 | 10 | 19.7 | 43.8 | 5.6  | 30.9 | 0.256 | 0.287 | 74.3  |
| 5 | 1 | 4 | 10 | 26.3 | 21.5 | 16.3 | 35.9 | 0.290 | 0.317 | 73.7  |
| 5 | 2 | 3 | 10 | 21.5 | 23.6 | 12.0 | 42.9 | 0.265 | 0.294 | 114.2 |
| 5 | 3 | 2 | 10 | 18.2 | 30.6 | 10.0 | 41.2 | 0.259 | 0.291 | 87.2  |
| 5 | 4 | 1 | 10 | 22.1 | 38.4 | 4.8  | 34.7 | 0.270 | 0.299 | 82.2  |
| 6 | 1 | 3 | 10 | 34.8 | 14.4 | 12.6 | 38.2 | 0.273 | 0.309 | 69.0  |
| 6 | 2 | 2 | 10 | 32.4 | 21.7 | 7.3  | 38.6 | 0.268 | 0.305 | 78.3  |
| 6 | 3 | 1 | 10 | 29.0 | 27.3 | 4.5  | 39.2 | 0.270 | 0.307 | 64.9  |
| 7 | 1 | 2 | 10 | 43.1 | 9.7  | 10.8 | 36.4 | 0.296 | 0.332 | 71.7  |
| 7 | 2 | 1 | 10 | 39.2 | 14.8 | 7.9  | 38.2 | 0.280 | 0.315 | 78.0  |
| 8 | 1 | 1 | 10 | 46.8 | 9.5  | 7.0  | 36.7 | 0.279 | 0.315 | 91.1  |

**Table S3.** The precursor ratio of compounds shown in the plots and their corresponding formulas by EDS atomic ratio.

| Precursor ratio |           |           | Molecular formula<br>from EDS atomic ratio                            |
|-----------------|-----------|-----------|-----------------------------------------------------------------------|
| Ni              | Cu        | Co        |                                                                       |
| 10              |           |           | NiSe                                                                  |
|                 | 10        |           | Cu <sub>3</sub> Se <sub>2</sub>                                       |
|                 |           | 10        | CoSe                                                                  |
|                 | <b>Co</b> | <b>Cu</b> |                                                                       |
|                 | 1         | 9         | (Co <sub>0.04</sub> Cu <sub>0.96</sub> ) <sub>3</sub> Se <sub>2</sub> |
|                 | 2         | 8         | (Co <sub>0.17</sub> Cu <sub>0.83</sub> ) <sub>3</sub> Se <sub>2</sub> |
|                 | 3         | 7         | (Co <sub>0.24</sub> Cu <sub>0.76</sub> ) <sub>3</sub> Se <sub>2</sub> |

|                |           |                                                   |                                                                   |
|----------------|-----------|---------------------------------------------------|-------------------------------------------------------------------|
| Co-Cu<br>Group | 4         | 6                                                 | $(\text{Co}_{0.29}\text{Cu}_{0.71})_3\text{Se}_2$                 |
|                | 5         | 5                                                 | $(\text{Co}_{0.40}\text{Cu}_{0.60})_3\text{Se}_2$                 |
|                | 6         | 4                                                 | $(\text{Co}_{0.47}\text{Cu}_{0.53})_3\text{Se}_2$                 |
|                | 7         | 3                                                 | $(\text{Co}_{0.5}\text{Cu}_{0.5})_3\text{Se}_2$                   |
|                | 8         | 2                                                 | $(\text{Co}_{0.73}\text{Cu}_{0.27})_3\text{Se}_2$                 |
|                | 9         | 1                                                 | $(\text{Co}_{0.82}\text{Cu}_{0.18})_3\text{Se}_2$                 |
| Ni-Co<br>Group | <b>Ni</b> | <b>Co</b>                                         |                                                                   |
|                | 1         | 9                                                 | $(\text{Ni}_{0.11}\text{Co}_{0.89})\text{Se}$                     |
|                | 2         | 8                                                 | $(\text{Ni}_{0.19}\text{Co}_{0.81})\text{Se}$                     |
|                | 3         | 7                                                 | $(\text{Ni}_{0.32}\text{Co}_{0.68})\text{Se}$                     |
|                | 4         | 6                                                 | $(\text{Ni}_{0.42}\text{Co}_{0.58})\text{Se}$                     |
|                | 5         | 5                                                 | $(\text{Ni}_{0.51}\text{Co}_{0.49})\text{Se}$                     |
|                | 6         | 4                                                 | $(\text{Ni}_{0.62}\text{Co}_{0.38})\text{Se}$                     |
|                | 7         | 3                                                 | $(\text{Ni}_{0.71}\text{Co}_{0.29})\text{Se}$                     |
|                | 8         | 2                                                 | $(\text{Ni}_{0.75}\text{Co}_{0.28})\text{Se}$                     |
| 9              | 1         | $(\text{Ni}_{0.9}\text{Co}_{0.1})\text{Se}$       |                                                                   |
| Ni-Cu<br>Group | <b>Ni</b> | <b>Cu</b>                                         |                                                                   |
|                | 1         | 9                                                 | $(\text{Ni}_{0.06}\text{Cu}_{0.94})_3\text{Se}_2$                 |
|                | 2         | 8                                                 | $(\text{Ni}_{0.12}\text{Cu}_{0.88})_3\text{Se}_2$                 |
|                | 3         | 7                                                 | $(\text{Ni}_{0.23}\text{Cu}_{0.77})_3\text{Se}_2$                 |
|                | 4         | 6                                                 | $(\text{Ni}_{0.28}\text{Cu}_{0.72})_3\text{Se}_2$                 |
|                | 5         | 5                                                 | $(\text{Ni}_{0.35}\text{Cu}_{0.65})_3\text{Se}_2$                 |
|                | 6         | 4                                                 | $(\text{Ni}_{0.46}\text{Cu}_{0.54})_3\text{Se}_2$                 |
|                | 7         | 3                                                 | $(\text{Ni}_{0.52}\text{Cu}_{0.48})_3\text{Se}_2$                 |
|                | 8         | 2                                                 | $(\text{Ni}_{0.7}\text{Cu}_{0.3})_3\text{Se}_2$                   |
| 9              | 1         | $(\text{Ni}_{0.77}\text{Cu}_{0.23})_3\text{Se}_2$ |                                                                   |
| <b>Co</b>      | <b>Ni</b> | <b>Cu</b>                                         |                                                                   |
| 1              | 4         | 5                                                 | $(\text{Co}_{0.08}\text{Ni}_{0.28}\text{Cu}_{0.63})_3\text{Se}_2$ |
| 2              | 2         | 6                                                 | $(\text{Co}_{0.15}\text{Ni}_{0.15}\text{Cu}_{0.7})_3\text{Se}_2$  |
| 2              | 4         | 4                                                 | $(\text{Co}_{0.15}\text{Ni}_{0.26}\text{Cu}_{0.59})_3\text{Se}_2$ |
| 3              | 3         | 4                                                 | $(\text{Co}_{0.21}\text{Ni}_{0.25}\text{Cu}_{0.54})_3\text{Se}_2$ |
| 4              | 1         | 5                                                 | $(\text{Co}_{0.31}\text{Ni}_{0.08}\text{Cu}_{0.61})_3\text{Se}_2$ |
| 4              | 3         | 3                                                 | $(\text{Co}_{0.31}\text{Ni}_{0.23}\text{Cu}_{0.46})_3\text{Se}_2$ |



|   |   |   |                                                                   |
|---|---|---|-------------------------------------------------------------------|
| 5 | 1 | 4 | $(\text{Co}_{0.36}\text{Ni}_{0.07}\text{Cu}_{0.57})_3\text{Se}_2$ |
|---|---|---|-------------------------------------------------------------------|

**Table S4.** Comparison of three binary selenides, best performing ternary selenides and best quaternary selenide.

| Catalysts                                                         | Onset $\eta$ / V | $\eta$ at 10 mA $\text{cm}^{-2}$ /V | Tafel slope / $\text{mV dec}^{-1}$ |
|-------------------------------------------------------------------|------------------|-------------------------------------|------------------------------------|
| NiSe                                                              | 0.300            | 0.335                               | 66.2                               |
| $\text{Cu}_3\text{Se}_2$                                          | 0.282            | 0.326                               | 82.9                               |
| CoSe                                                              | 0.262            | 0.308                               | 177.4                              |
| $(\text{Co}_{0.4}\text{Cu}_{0.6})_3\text{Se}_2$                   | 0.257            | 0.278                               | 72.5                               |
| $(\text{Ni}_{0.51}\text{Co}_{0.49})\text{Se}$                     | 0.259            | 0.289                               | 60.7                               |
| $(\text{Ni}_{0.77}\text{Cu}_{0.23})_3\text{Se}_2$                 | 0.268            | 0.299                               | 90.4                               |
| $(\text{Co}_{0.21}\text{Ni}_{0.25}\text{Cu}_{0.54})_3\text{Se}_2$ | 0.241            | 0.272                               | 53.3                               |

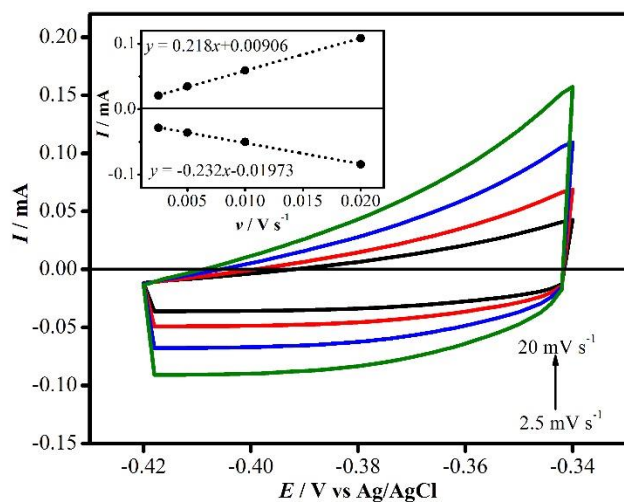

**Figure S7.** Cyclic voltammograms measured for the  $(\text{Co}_{0.21}\text{Ni}_{0.25}\text{Cu}_{0.54})_3\text{Se}_2$  after 12 h chronoamperometry in  $\text{N}_2$  saturated 1.0 M KOH solution at different scan rates from 2.5 to 20  $\text{mV s}^{-1}$ . The inset is a plot of both anodic and cathodic currents measured at -0.36 V vs Ag|AgCl (KCl saturated) as a function of scan rate.

**Table S5.** Comparison of ECSA and roughness factor (RF) of  $(\text{Co}_{0.21}\text{Ni}_{0.25}\text{Cu}_{0.54})_3\text{Se}_2$  before and after chronoamperometry.

|        | ECSA / $\text{cm}^2$ | RF    |
|--------|----------------------|-------|
| Before | 3.68                 | 52.57 |
| After  | 5.63                 | 80.36 |

**Table S6.** Comparison of EDS atomic ratio of  $(\text{Co}_{0.21}\text{Ni}_{0.25}\text{Cu}_{0.54})_3\text{Se}_2$  before and after electrochemical measurement.

|                | EDS (Atomic %) |      |      |      |
|----------------|----------------|------|------|------|
|                | Ni             | Cu   | Co   | Se   |
| As-deposited   | 16.1           | 33.9 | 13.1 | 37.0 |
| After activity | 15.3           | 35.6 | 12.4 | 36.7 |

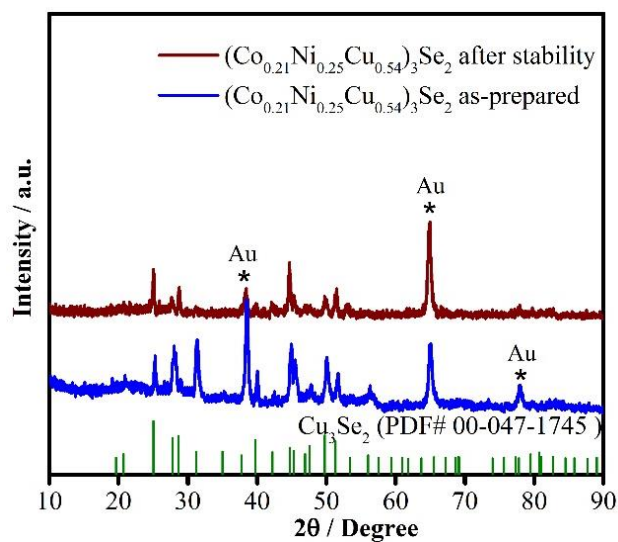

**Figure S8.** XRD patterns of as-prepared  $(\text{Co}_{0.21}\text{Ni}_{0.25}\text{Cu}_{0.54})_3\text{Se}_2$  and  $(\text{Co}_{0.21}\text{Ni}_{0.25}\text{Cu}_{0.54})_3\text{Se}_2$  after 12 h chronoamperometry along with reference  $\text{Cu}_3\text{Se}_2$  (PDF # 00-047-1745).

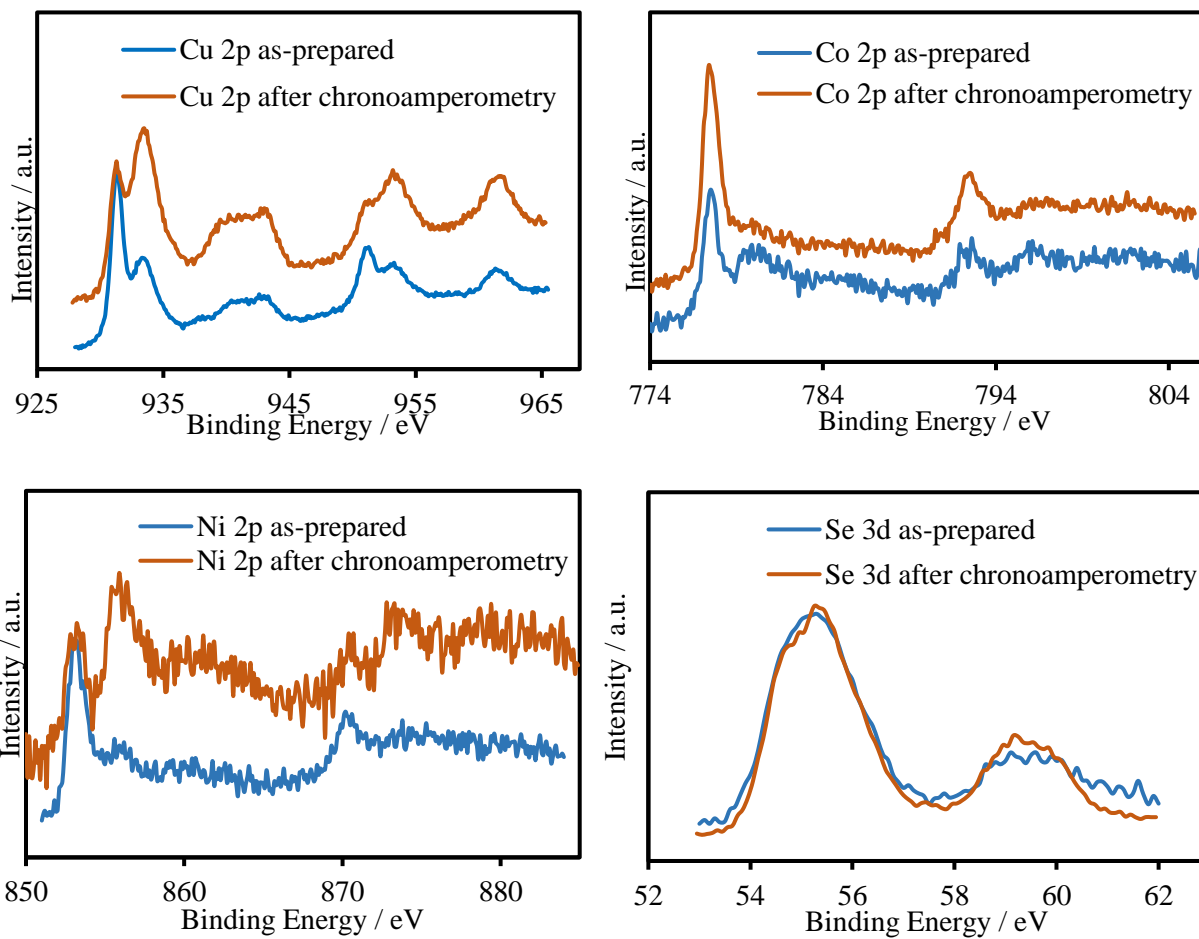

**Figure S9.** Comparison of XPS spectra of  $(\text{Co}_{0.21}\text{Ni}_{0.25}\text{Cu}_{0.54})_3\text{Se}_2$  catalyst before and after chronoamperometry.

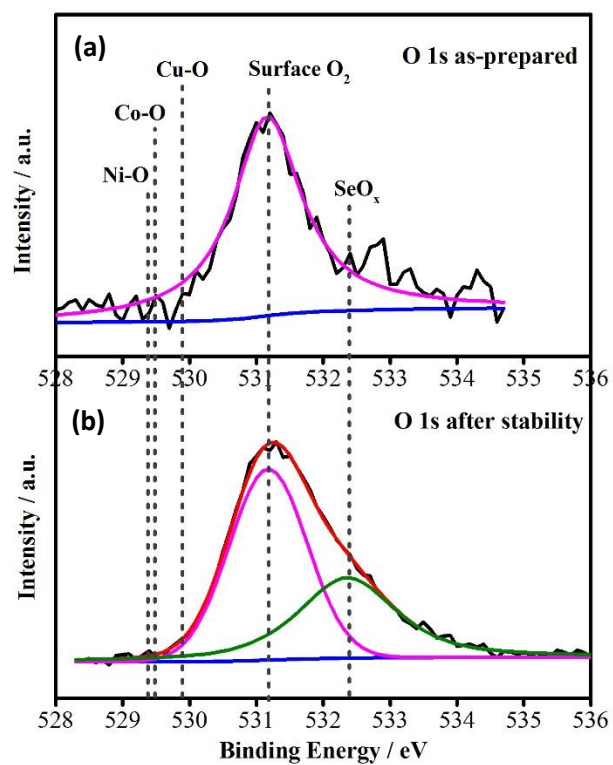

**Figure S10.** Comparison of XPS spectra of  $(\text{Co}_{0.21}\text{Ni}_{0.25}\text{Cu}_{0.54})_3\text{Se}_2$  catalyst before and after chronoamperometry.

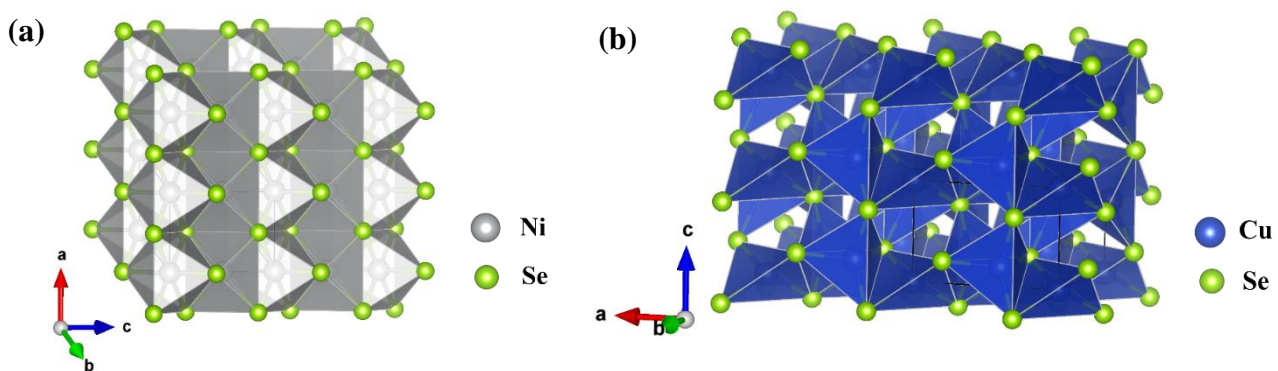

**Figure S11.** Crystal structure of (a) NiSe and (b)  $\text{Cu}_3\text{Se}_2$ .
